# Supplementary material
Source: Research Square preprint supplement (doi:10.21203/rs.3.rs-9423021/v1)
Supplement: Supplementary file 1 [file 285310e91f8a68b3b1952a96.xlsx]

## Sheet: Sheet1
Suppl Table 1: Patients’ results
Case	M/F	Months old	Body weight(kg)	Underlying disease
1	F	9	6.7	Waardenburg syndrome
2	M	57	14.5	-
3	M	53	14.5	Agenesis of the corpus callosum
4	F	1	4.5	-
5	F	30	11.9	-
6	M	43	13.4	-
7	M	32	13.8	-
8	M	2	6.3	-
9	F	1	5.5	Anal stenosis
10	F	3	3.4	VLBWI, After stoma creation due to functional ileus
				]]
